# Supplementary material for: XBB.1.5 Kraken Cracked: Gibbs Energies of Binding and Biosynthesis of the XBB.1.5 Variant of SARS-Cov-2
Source: Preprints.org preprint supplement (doi:10.20944/preprints202301.0404.v1), 2023-01-23
Supplement: Supplementary file 1 [file supplementary]

## SUPPLEMENTAL TABLE

### **Data Availability**

GISAID Identifier: EPI\_SET\_230117yo

doi: [10.55876/gis8.230117yo](https://doi.org/10.55876/gis8.230117yo)

All genome sequences and associated metadata in this dataset are published in GISAID's EpiCoV database. To view the contributors of each individual sequence with details such as accession number, Virus name, Collection date, Originating Lab and Submitting Lab and the list of Authors, visit [10.55876/gis8.230117yo](https://gisaid.org/230117yo)

### **Data Snapshot**

- EPI\_SET\_230117yo is composed of 5 individual genome sequences.
- The collection dates range from 2022-12-15 to 2022-12-31;
- Data were collected in 5 countries and territories;
- All sequences in this dataset are compared relative to hCoV-19/Wuhan/WIV04/2019 (WIV04), the official reference sequence employed by GISAID (EPI\_ISL\_402124). Learn more at <https://gisaid.org/WIV04>.
